# Supplementary material for: Blocking lncRNA MALAT1/miR-199a/ZHX1 Axis Inhibits Glioblastoma Proliferation and Progression
Source: PubMed Central journal article supplement (PMC6819876; doi:10.1016/j.omtn.2019.09.005), 2019-09-17
Supplement: mmc1.pdf [file mmc1.pdf]

OMTN, Volume 18

## Supplemental Information

**Blocking lncRNA *MALAT1*/miR-199a/ZHX1**

**Axis Inhibits Glioblastoma**

**Proliferation and Progression**

**Keman Liao, Yingying Lin, Weizhen Gao, Zhipeng Xiao, Rogelio Medina, Pauline Dmitriev, Jing Cui, Zhengping Zhuang, Xiaochun Zhao, Yongming Qiu, Xiaohua Zhang, Jianwei Ge, and Liemei Guo**

1 **Supplementary Methods**

2 **Northern Blotting**

3 Approximately 30  $\mu\text{g}$  of total RNAs were run on 10% polyacrylamide gel and  
4 transferred to a Hybond-N+ membrane (GE Healthcare, UK). The same membrane was  
5 hybridized with probes, stripped and reprobred with 5'-end,  $^{32}\text{P}$ -labeled  
6 oligonucleotides complementary to targeted sequences. The oligonucleotide sequences  
7 are as follows: for miR-199a detection, 5'-GAACAGGTAGTCTGAACACTGGG-3';  
8 U6: 5'-ACGAATTTGCGTGTCATCCTTGCG-3'. Results were visualized through  
9 phosphorimaging (Typhoon).

10

11 **Supplementary figures and figure legends**

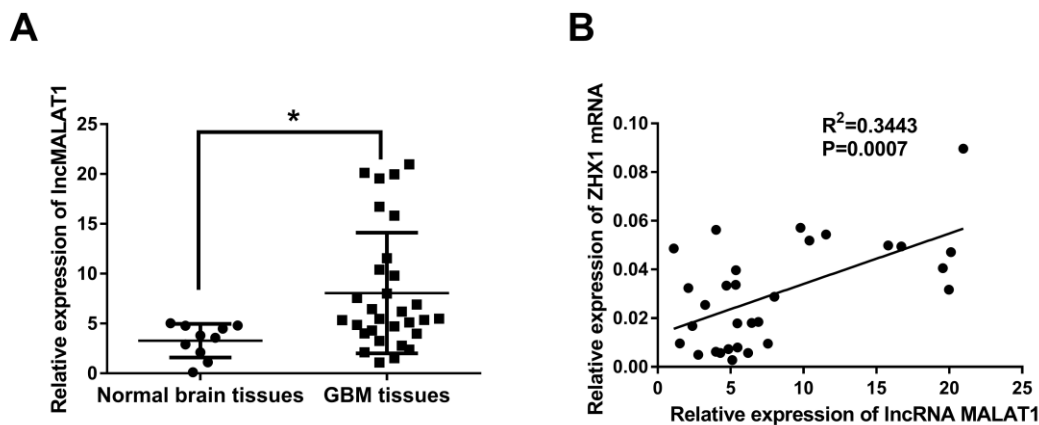

12

13 **Figure S1. ZHX1 mRNA level was positively correlated with MALAT1 level**

14 (A) The relative expression level of *MALAT1* was analyzed by RT-qPCR in GBM tissue  
15 and normal control. (B) A correlation analysis demonstrated that ZHX1 mRNA level  
16 was positively correlated with *MALAT1* level ( $R^2=0.3443$ ,  $p<0.05$ ).

17

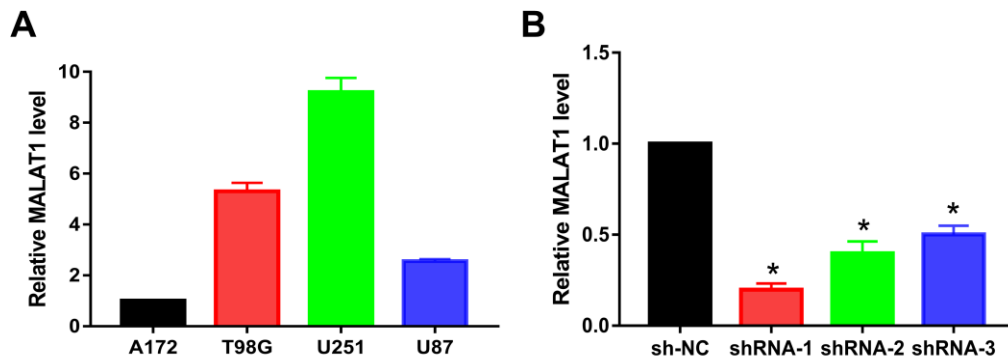

1

2 **Figure S2. *MALAT1* expression levels in glioma cell lines and knockdown**  
 3 **efficiency of *MALAT1* shRNAs**

4 (A) *MALAT1* expression level was measured by RT-qPCR in 4 glioma cell lines (A172,  
 5 T98G, U251, and U87). (B) shRNAs against *MALAT1* were designed and assessed by  
 6 RT-qPCR for knockdown efficacy.

7

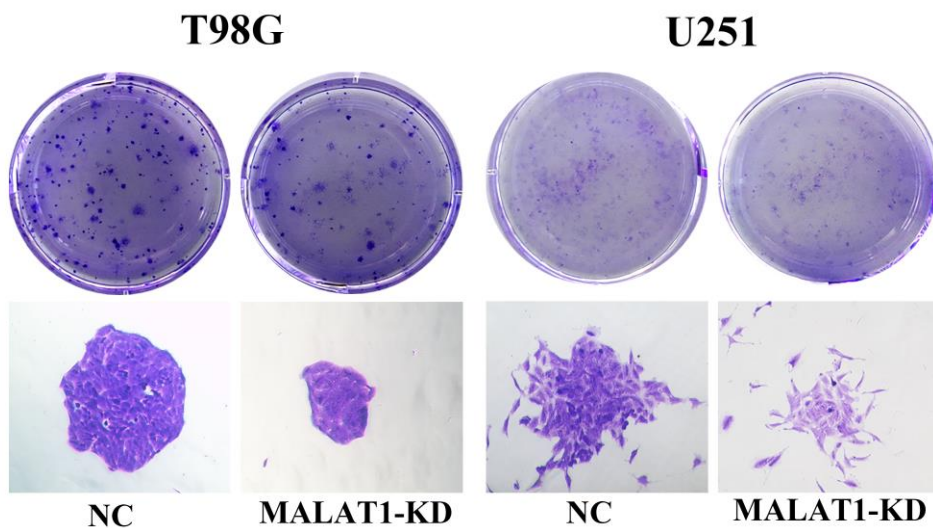

8

9 **Figure S3. Knockdown of *MALAT1* in GBM cells reduced the number of GBM**  
 10 **colonies and colony sizes**

11 Knockdown of *MALAT1* in GBM cells (T98G and U251) reduced the number of GBM

1 colonies and colony sizes in the colony formation assay.

2

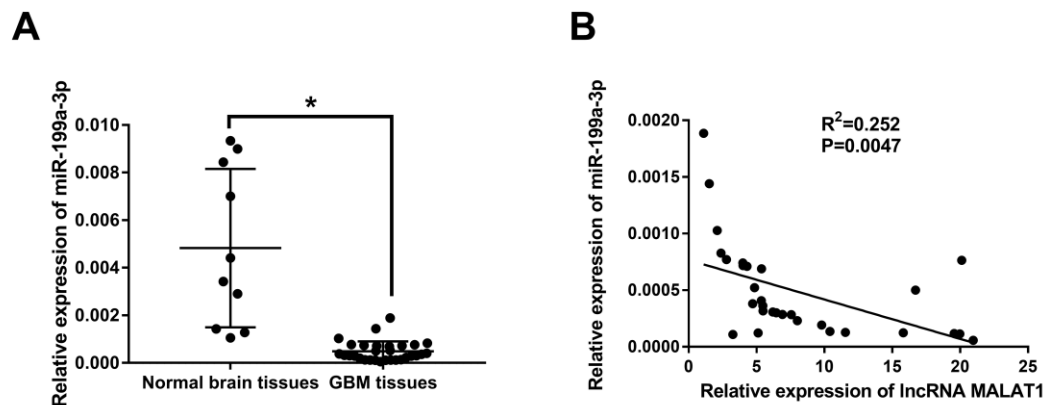

3

4 **Figure S4. miR-199a level was negatively correlated with *MALAT1* level in GBM**  
5 **tissues**

6 (A) The relative expression level of miR-199a was analyzed by RT-qPCR in GBM  
7 tissue and normal control. (B) Correlation analysis demonstrated that miR-199a level  
8 was negatively correlated with *MALAT1* level ( $R^2=0.252$ ,  $p<0.01$ ).

9

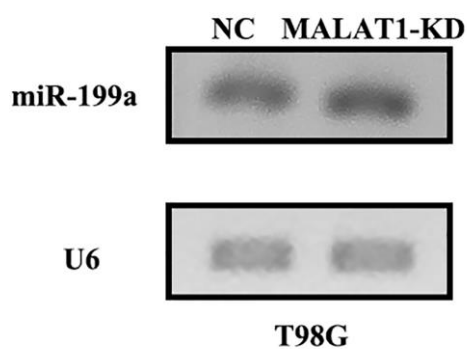

10

11 **Figure S5. Northern blot analysis of miR-199a**

12 Northern blot analysis of miR-199a in glioma cells with or without *MALAT1*-KD. U6  
13 was used as a loading control.
